# Supplementary material for: Influence of thermal vibrations on aromaticity of benzene
Source: Royal Society of Chemistry journal article supplement (doi:10.1039/c1cp20165d), 2011-01-01
Supplement: c1cp20165d.pdf [file c1cp20165d.pdf]

## Electronic Supplementary Information

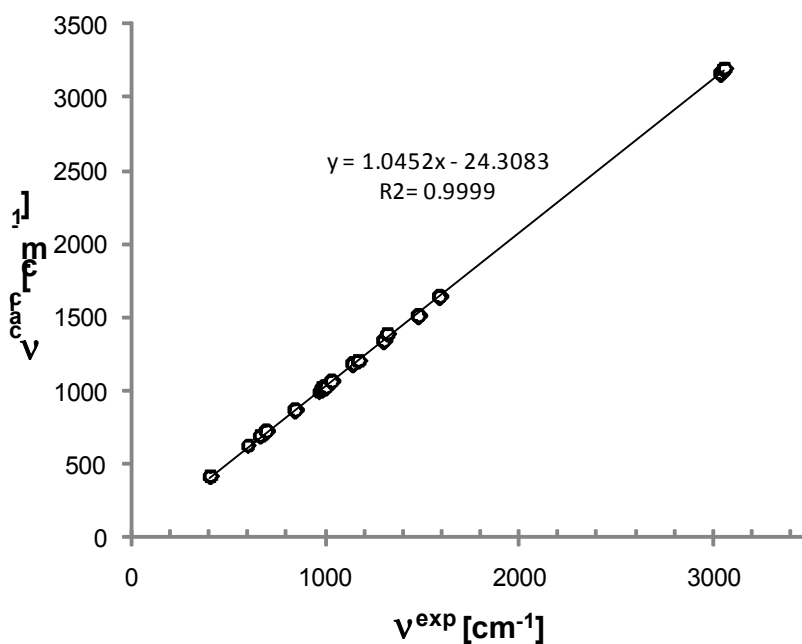

**Fig.S1.** The correlation between theoretical (B3LYP/6-311+G\*\*) and experimental vibration frequencies [56]

5

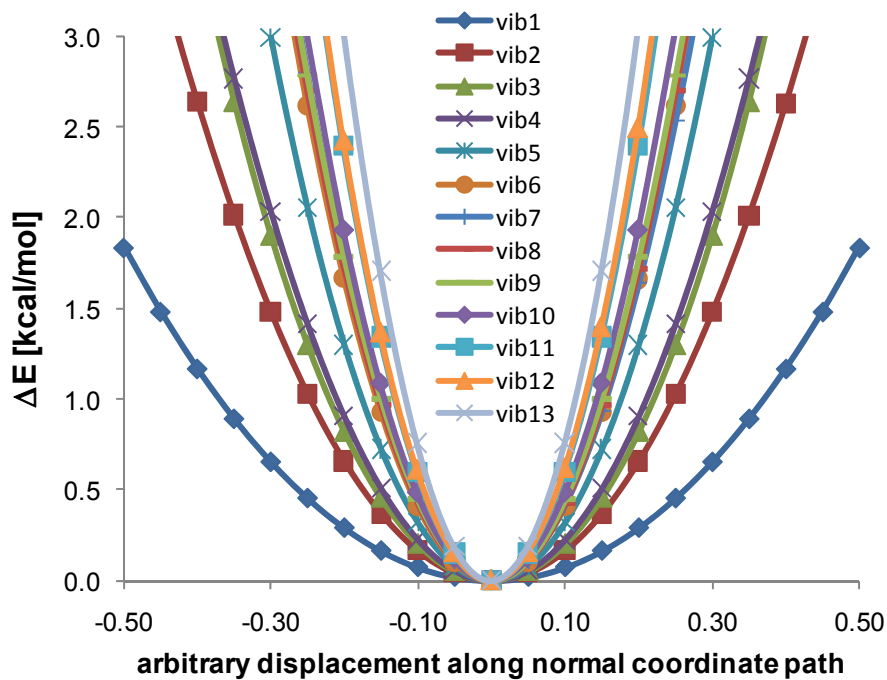

**Fig.S2** Correlation between benzene molecule energy ( $\Delta E_i(D_i) = \pi c h \Delta \nu_i$ , with respect of the ground state ie. not-perturbed structure) and displacement along the normal coordinate paths for first 13 vibrations at room temperature. Presented points correspond to energy estimated at B3LYP/6-311+G\*\* level of theory.

**Table S1** Calculated and experimental frequencies, assignment and population of excited vibrational modes for normal vibrations of benzene contributing to thermal vibrations at normal temperature.

| No | $\nu_i^{calc}$ [ $cm^{-1}$ ] | $\nu_i^{exp}$ [ $cm^{-1}$ ] <sup>a</sup> | symmetry | Assignment (% of PED <sup>b</sup> )                                                                                                                                                                                                                                         | % in the population |
|----|------------------------------|------------------------------------------|----------|-----------------------------------------------------------------------------------------------------------------------------------------------------------------------------------------------------------------------------------------------------------------------------|---------------------|
| 1  | 410.8                        | 410                                      | e2u      | ring out-of-plane (degeneration=2)<br>D1(8.9%), D5(8.9%), D13(8.9%), D17(8.9%), D2(6.8%), D6(6.8%), D15(6.8%), D18(6.8%), D3(4.7%), D7(4.7%), D14(4.7%), D19(4.7%), D4(2.6%), D8(2.6%), D16(2.6%), D20(2.6%)                                                                | 29.1%               |
| 2  | 622.2                        | 606                                      | e2g      | ring in-of-plane (degeneration=2)<br>R2(9.4%), R6(9.4%), R5(7.9%), R11(7.9%), A9(5.1%), A17(5.1%), A5(4.6%), A14(4.6%), A8(4.1%), A18(4.1%), A2(3.5%), A12(3.5%), A4(3.2%), A13(3.2%), R1(3.1%), R8(3.1%), A1(2.3%), A10(2.3%), R7(2.1%), R12(2.1%)                         | 15.3%               |
| 3  | 687.5                        | 673                                      | a2u      | symmetric CH out-of-plane<br>D2(8.3%), D3(8.3%), D6(8.3%), D7(8.3%), D10(8.3%), D11(8.3%), D14(8.3%), D15(8.3%), D18(8.3%), D19(8.3%), D22(8.3%), D23(8.3%)                                                                                                                 | 6.6%                |
| 4  | 719.1                        | 703                                      | b2g      | ring out-of-plane<br>D1(8.2%), D5(8.2%), D9(8.2%), D13(8.2%), D17(8.2%), D21(8.2%), D2(4.2%), D3(4.2%), D6(4.2%), D7(4.2%), D10(4.2%), D11(4.2%), D14(4.2%), D15(4.2%), D18(4.2%), D19(4.2%), D22(4.2%), D23(4.2%)                                                          | 6.1%                |
| 5  | 863.0                        | 849                                      | e1g      | asymmetric CH out-of plane (degeneration=2)<br>D3(8.3%), D7(8.3%), D12(8.3%), D14(8.3%), D19(8.3%), D24(8.3%), D2(6.7%), D8(6.7%), D11(6.7%), D16(6.7%), D18(6.7%), D23(6.7%)                                                                                               | 8.6%                |
| 6  | 987.3                        | 975                                      | e2u      | asymmetric CH out-of plane (degeneration=2)<br>D12(11.3%), D24(11.3%), D4(6.3%), D20(6.3%), D2(5.8%), D18(5.8%), D6(5.5%), D15(5.5%), D8(5%), D16(5%), D11(4.7%), D23(4.7%), D10(4.1%), D22(4.1%), D9(2.5%), D21(2.5%)                                                      | 6.4%                |
| 7  | 1010.6                       | 992                                      | a1g      | Ring str<br>R1(9.8%), R8(9.8%), R4(7.1%), R10(7.1%), A7(6.4%), A16(6.4%), A1(4.7%), A10(4.7%), A3(4%), A11(4%), A9(3.8%), A17(3.8%), A6(3.2%), A15(3.2%), R2(2.7%), R6(2.7%), A8(2.6%), A18(2.6%)                                                                           | 3.0%                |
| 8  | 1017.2                       | 995                                      | b2g      | CH bend<br>D4(8.3%), D8(8.3%), D12(8.3%), D16(8.3%), D20(8.3%), D24(8.3%), D2(3%), D3(3%), D6(3%), D7(3%), D10(3%), D11(3%), D14(3%), D15(3%), D18(3%), D19(3%), D22(3%), D23(3%), D1(2.3%), D5(2.3%), D9(2.3%), D13(2.3%), D17(2.3%), D21(2.3%)                            | 3.0%                |
| 9  | 1022.4                       | 1010                                     | b1u      | Ring out-of-plane<br>R2(11.6%), R6(11.6%), R4(8.6%), R10(8.6%), A2(4.4%), A5(4.4%), A7(4.4%), A12(4.4%), A14(4.4%), A16(4.4%), A1(3.2%), A6(3.2%), A8(3.2%), A10(3.2%), A15(3.2%), A18(3.2%), R1(3.1%), R8(3.1%)                                                            | 2.9%                |
| 10 | 1058.7                       | 1038                                     | e1u      | CH bend (degeneration=2)<br>R5(11%), R11(11%), A8(6.8%), A18(6.8%), A9(4.1%), A17(4.1%), R1(3.7%), R2(3.7%), R4(3.7%), R6(3.7%), R8(3.7%), R10(3.7%), R7(3.1%), R12(3.1%), A5(2.9%), A14(2.9%), A1(2.7%), A4(2.7%), A7(2.7%), A10(2.7%), A13(2.7%), A16(2.7%)               | 5.4%                |
| 11 | 1174.5                       | 1150                                     | b2u      | CH bend<br>R5(11.9%), R11(11.9%), R3(8.8%), R9(8.8%), A8(5.2%), A18(5.2%), A9(5%), A17(5%), A2(4%), A12(4%), A3(3.4%), A11(3.4%), R7(3.1%), R12(3.1%), R1(2.1%), R8(2.1%)                                                                                                   | 2.0%                |
| 12 | 1197.1                       | 1178                                     | e2g      | CH bend (degeneration=2)<br>R5(16.8%), R11(16.8%), A9(7.7%), A17(7.7%), A8(7.3%), A18(7.3%), R7(4.4%), R12(4.4%), A5(2.8%), A14(2.8%), R4(2.6%), R10(2.6%)                                                                                                                  | 3.8%                |
| 13 | 1335.7                       | 1310                                     | b2u      | Ring str<br>R5(6.8%), R11(6.8%), R1(5.7%), R8(5.7%), A9(5.5%), A17(5.5%), R3(5%), R9(5%), A8(4.9%), A18(4.9%), A3(4.6%), A11(4.6%), R4(4.1%), R10(4.1%), A2(3%), A12(3%), A6(2.5%), A15(2.5%), A4(2.1%), A13(2.1%)                                                          | 1.4%                |
| 14 | 1380.9                       | 1326                                     | a2g      | CH bend (degeneration=2)<br>R5(11.7%), R11(11.7%), R3(8.6%), R9(8.6%), A9(5.5%), A17(5.5%), A8(5.3%), A18(5.3%), A3(4.3%), A11(4.3%), A2(3.6%), A12(3.6%), R7(3.1%), R12(3.1%), A6(2%), A15(2%)                                                                             | 2.7%                |
| 15 | 1510.0                       | 1486                                     | e1u      | Ring str + deform str (degeneration=2)<br>R5(12.3%), R11(12.3%), A9(7.3%), A17(7.3%), A8(4.9%), A18(4.9%), R1(3.2%), R2(3.2%), R4(3.2%), R6(3.2%), R8(3.2%), R10(3.2%), R7(3%), R12(3%), A6(2.7%), A15(2.7%), A1(2.4%), A4(2.4%), A7(2.4%), A10(2.4%), A13(2.4%), A16(2.4%) | 1.8%                |

|    |        |      |     |                                                                                                                                                                                                                                                 |      |
|----|--------|------|-----|-------------------------------------------------------------------------------------------------------------------------------------------------------------------------------------------------------------------------------------------------|------|
| 16 | 1633.1 | 1596 | e2g | Ring str(degeneration=2)<br>R1(7.1%), R8(7.1%), R3(7%), R9(7%), A3(5.9%), A11(5.9%),<br>R5(5.4%), R11(5.4%), A9(4.6%), A17(4.6%), A7(4.1%), A16(4.1%),<br>R4(3.2%), R10(3.2%), A2(3.2%), A12(3.2%), A1(2.7%), A10(2.7%),<br>A6(2.2%), A15(2.2%) | 1.3% |
| 17 | 3155.5 | 3047 | e2g | CH str (degeneration=3)<br>R7(11.1%), R12(11.1%), R3(8.1%), R9(8.1%), A5(6%), A14(6%),<br>A6(5.8%), A15(5.8%), A2(4.6%), A12(4.6%), A3(4.2%), A11(4.2%),<br>R5(3%), R11(3%)                                                                     | 0.0% |
| 18 | 3180.7 | 3062 | a1g | CH str (degeneration=2)<br>R3(12.2%), R9(12.2%), R7(9%), R12(9%), A2(6.4%), A12(6.4%),<br>A3(5.7%), A11(5.7%), A6(4.2%), A15(4.2%), A5(3.5%), A14(3.5%),<br>R5(2%), R11(2%)                                                                     | 0.0% |
| 19 | 3190.9 | 3063 | e1u | CH str<br>R7(12%), R12(12%), R3(8.7%), R9(8.7%), A5(5.8%), A14(5.8%),<br>A6(5.6%), A15(5.6%), A2(4.4%), A12(4.4%), A3(3.9%), A11(3.9%),<br>R5(3.3%), R11(3.3%)                                                                                  | 0.0% |

<sup>a</sup> T. Shimanouchi, "Molecular Vibrational Frequencies" in NIST Chemistry WebBook, NIST Standard Reference Database Number 69, Eds. P.J. Linstrom and W.G. Mallard, National Institute of Standards and Technology, Gaithersburg MD, 20899, <http://webbook.nist.gov>, (retrieved December 11, 2010).

<sup>b</sup> only most significant contributions (2%) are listed here

<sup>5</sup> **Table S2** The values of parabola parameter approximating benzene energy as a function of displacement along normal coordinates ( $E_n(d) = A \cdot d^2$ ). The scaling factors  $\chi_i$  were obtained according to formula:  $E_i = \chi_i \cdot E_i$ . The last column comprises amplitudes of displacement along normal coordinate of first 13 modes at room temperature.

|       | $A_i$ | $\chi_i$ | $D_i$ |
|-------|-------|----------|-------|
| vib1  | 7.24  | 1.000    | 0.390 |
| vib2  | 16.43 | 0.441    | 0.322 |
| vib3  | 20.79 | 0.348    | 0.307 |
| vib4  | 22.60 | 0.320    | 0.300 |
| vib5  | 32.84 | 0.221    | 0.275 |
| vib6  | 41.93 | 0.173    | 0.257 |
| vib7  | 42.70 | 0.170    | 0.255 |
| vib8  | 43.23 | 0.168    | 0.254 |
| vib9  | 44.55 | 0.163    | 0.253 |
| vib10 | 48.39 | 0.150    | 0.249 |
| vib11 | 60.02 | 0.121    | 0.236 |
| vib12 | 61.72 | 0.117    | 0.234 |
| vib13 | 76.38 | 0.095    | 0.222 |
